# Supplementary material for: A Penile Spine/Vibrissa Enhancer Sequence Is Missing in Modern and Extinct Humans but Is Retained in Multiple Primates with Penile Spines and Sensory Vibrissae
Source: PLoS One. 2013 Dec 19;8(12):e84258. doi: 10.1371/journal.pone.0084258 (PMC3868586; doi:10.1371/journal.pone.0084258)
Supplement: Table S1 — Specimen numbers and sources of chimpanzee (Pan troglodytes) and bonobo (Pan paniscus) specimens used in the PCR. (XLSX) [file pone.0084258.s001.xlsx]

## Sheet: Sheet1
Table S1. Specimen numbers and sources of chimpanzee (Pan troglodytes) and bonobo (Pan paniscus) specimens used in the PCR screen (see Figure 2).
Row	Lane	Species	ID Number	Source	Wildborn
Top	1	P. troglodytes	NS03487	Coriell, Yerkes	N
	2	P. troglodytes	NS03489	Coriell, Yerkes	N
	3	P. troglodytes	NS03612	Coriell, Yerkes	N
	4	P. troglodytes	NS03619	Coriell, Yerkes	N
	5	P. troglodytes	NS03621	Coriell, Yerkes	N
	6	P. troglodytes	NS03622	Coriell, Yerkes	N
	7	P. troglodytes	NS03623	Coriell, Yerkes	N
	8	P. troglodytes	NS03629	Coriell, Yerkes	N
	9	P. troglodytes	NS03639	Coriell, Yerkes	N
	10	P. troglodytes	NS03641	Coriell, Yerkes	N
	11	P. troglodytes	NS03646	Coriell, Yerkes	N
	12	P. troglodytes	NS03648	Coriell, Yerkes	N
	13	P. troglodytes	NS03650	Coriell, Yerkes	N
	14	P. troglodytes	NS03654	Coriell, Yerkes	N
	15	P. troglodytes	NS03656	Coriell, Yerkes	N
	16	P. troglodytes	NS03657	Coriell, Yerkes	N
	17	P. troglodytes	NS03659	Coriell, Yerkes	N
	18	P. troglodytes	NS03660	Coriell, Yerkes	N
	19	P. troglodytes	NS06006	Coriell, Yerkes	N
	20	P. troglodytes	PR00226	Coriell	N
	21	P. troglodytes	PR00238	Coriell	N
	22	P. troglodytes	PR00496	Coriell	Y
	23	P. troglodytes	PR00657	Coriell	N
	24	P. troglodytes	PR00738	Coriell	N
	25	P. troglodytes	PR00818	Coriell	N
Bottom	1	P. t. verus	A318	New Iberia, Wild born	Y
	2	P. t. verus	A337	New Iberia	Y
	3	P. t. verus	A037	New Iberia	Y
	4	P. t. verus	A056	New Iberia	Y
	5	P. t. verus	A129	New Iberia	Y
	6	P. t. verus	A256	New Iberia	Y
	7	P. t. schweinfurthii	2003	Primate Foundation of Arizona	Y
	8	P. t. verus	2017	Primate Foundation of Arizona	Y
	9	P. t. verus	2028	Primate Foundation of Arizona	Y
	10	P. t. verus	A202	New Iberia	Y
	11	P. t. verus	A204	New Iberia	Y
	12	P. t. verus	X119	New Iberia	Y
	13	P. t. verus	A336	New Iberia	Y
	14	P. t. verus	X038	New Iberia	Y
	15	P. t. verus	A185	New Iberia	Y
	16	P. t. verus	X081	New Iberia	Y
Bottom	17	P. t. verus	A332	New Iberia	Y
	18	P. t. verus	A182	New Iberia	Y
	19	P. t. verus	A212	New Iberia	Y
	20	P. paniscus	PR00092	Coriell	N
	21	P. paniscus	PR00251	Coriell	N
	22	P. paniscus	PR00524	Coriell	N
